# Supplementary material for: Antigenic Determinant of Helicobacter pylori FlaA for Developing Serological Diagnostic Methods in Children
Source: MDPI journal article supplement (doi:10.3390/pathogens11121544), 2022-12-15
Supplement: s1 [file s1]

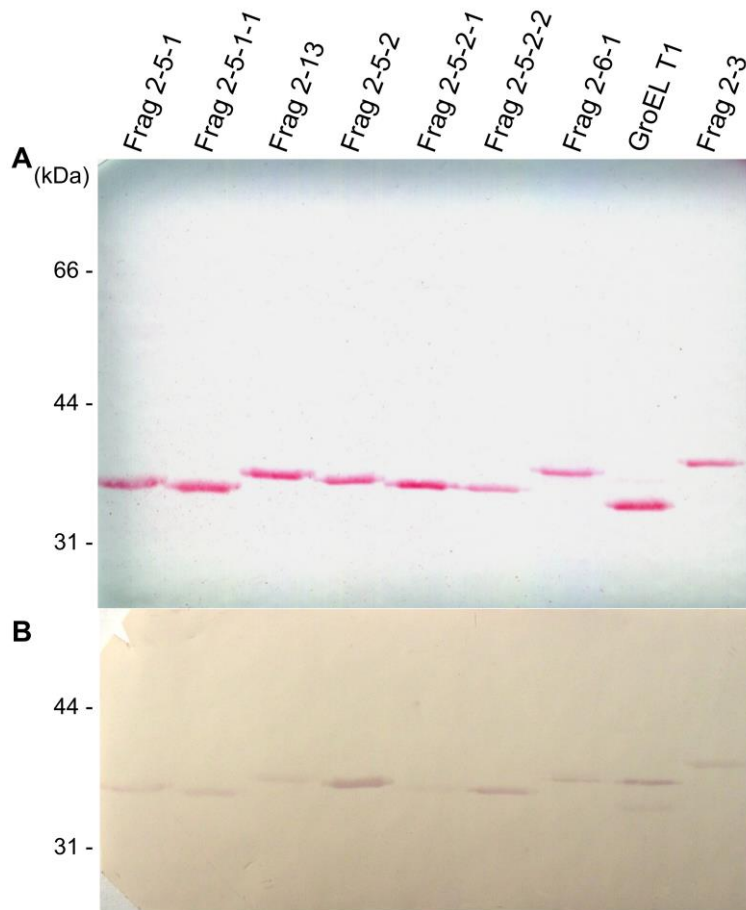

Supplementary Data S2. Immunoblot analysis of the recombinant subfragment proteins of FlaA. (A) Ponceau S staining and (B) Western blot analysis using *H. pylori*-positive pooled sera. Frag 2-13 is a subfragment recombinant protein of FlaA 1237-1347 bp. Because Frag 2-13 was divided into Frag 2-5-1-1 and Frag 2-5-2-1 to analyze the antigen reactivity in the present study, Frag 2-13 has not been explained.
